# Supplementary material for: Gravity-Based Flow Efficient Perfusion Culture System for Spheroids Mimicking Liver Inflammation
Source: MDPI journal article supplement (doi:10.3390/biomedicines9101369), 2021-10-01
Supplement: s1 [file s1]

Article

# Gravity-based Flow Efficient Perfusion Culture System for Spheroids Mimicking Liver Inflammation

Young Su Kim <sup>1,†</sup>, Arun Asif <sup>2,†</sup>, Abdul Rahim Chethikkattuveli Salih <sup>2</sup>, Jae Wook Lee <sup>2</sup>,  
Ki Nam Hyun <sup>1</sup> and Kyung Hyun Choi <sup>1,2,\*</sup>

<sup>1</sup> BioSpero Inc., Jeju-si 63243, Jeju-do, South Korea; youngsu1742@naver.com (Y.S.K.); gusrlska8204@naver.com (K.N.H.)

<sup>2</sup> Advanced Micro Mechatronics Lab., Department of Mechatronics Engineering, Jeju National University, Jeju-si 63243, Jeju-do, South Korea; arunasif@hotmail.com (A.A.); abdul.rahim350@gmail.com (A.R.C.S.); jaewook482@gmail.com (J.W.L.)

\* Correspondence: amm@jejunu.ac.kr; Tel.: +82-64-754-3713; Fax: +82-64-752-3174

† Authors contributed equally.

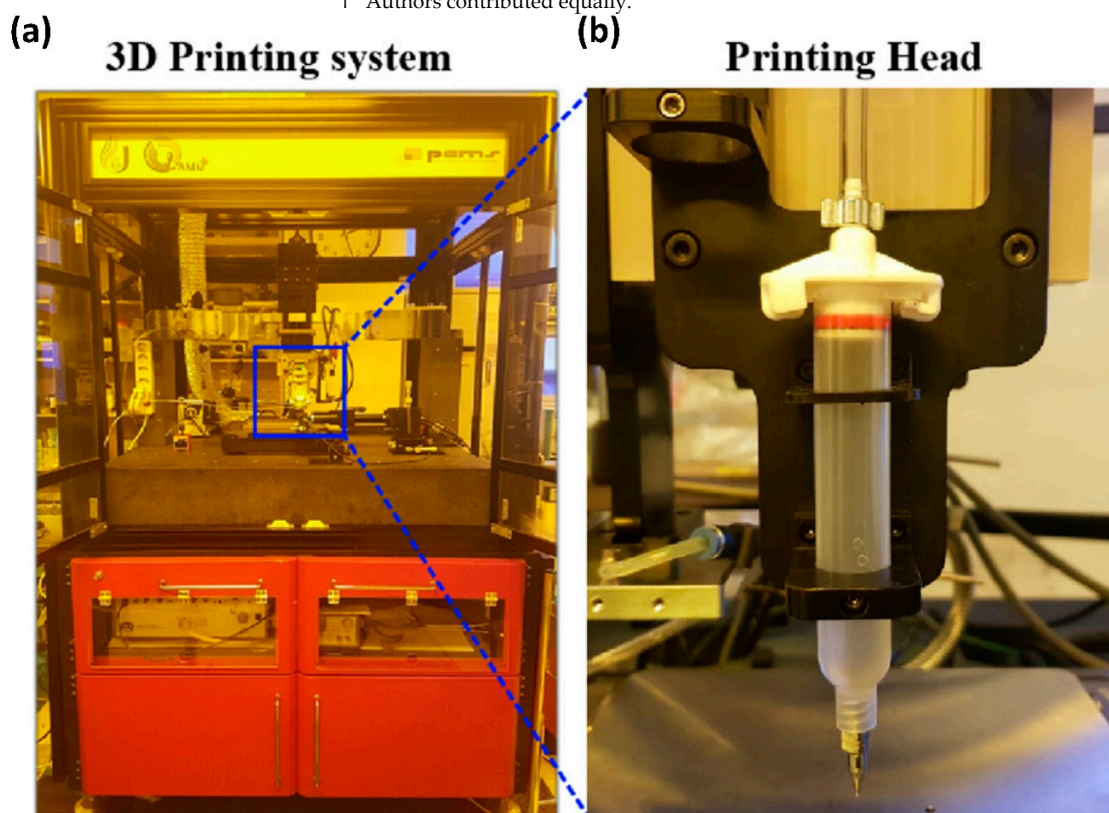

**Figure S1.** Inhouse built ink-jet printer. (a) EHD Multi-head system for 3D channel printing. (b) printing head.

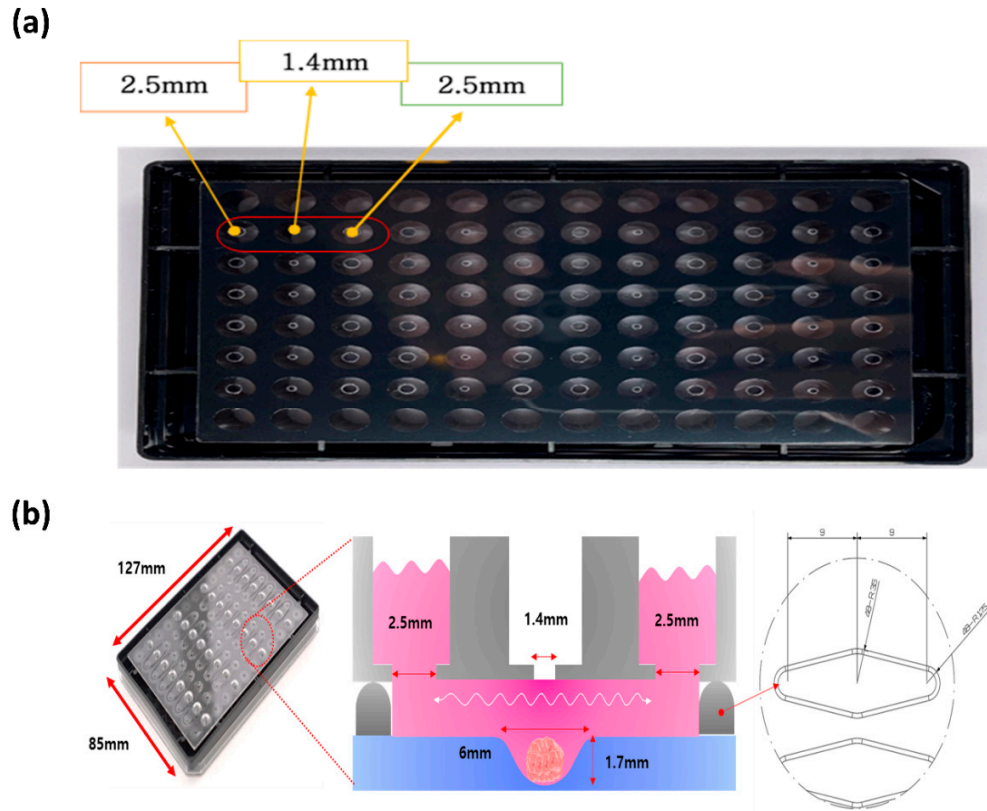

**Figure S2.** Schematics of the M-Physio™ plate with dimensions (a) Black plate used to fabricate PMMA hemisphere spheroid wells in the bottom. (b) The schematics of the M-Physio™ plate with dimensions.

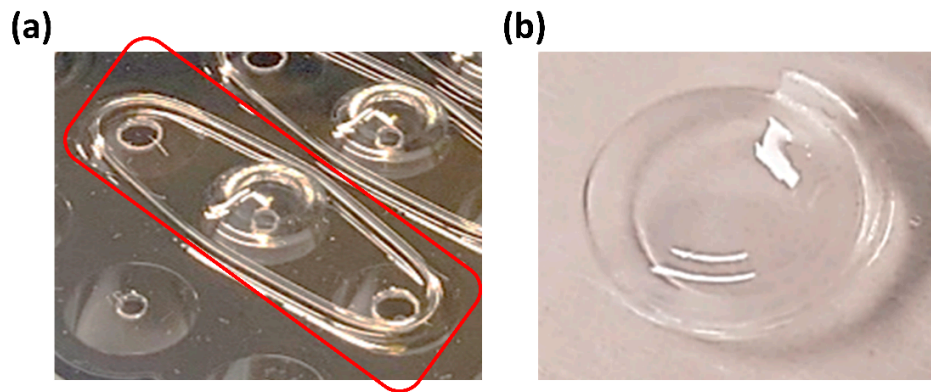

**Figure S3.** Macro view of perfusion channels and hemisphere well (a) The macro view of perfusion channels in the hemisphere wells (b) 1% Pluronic coating in the hemisphere well.
